# Supplementary material for: Interleukin 17 signaling supports clinical benefit of dual CTLA-4 and PD-1 checkpoint inhibition in melanoma
Source: PubMed Central journal article supplement (PMC10518254; doi:10.1038/s43018-023-00610-2), 2023-07-31

Figure 2g

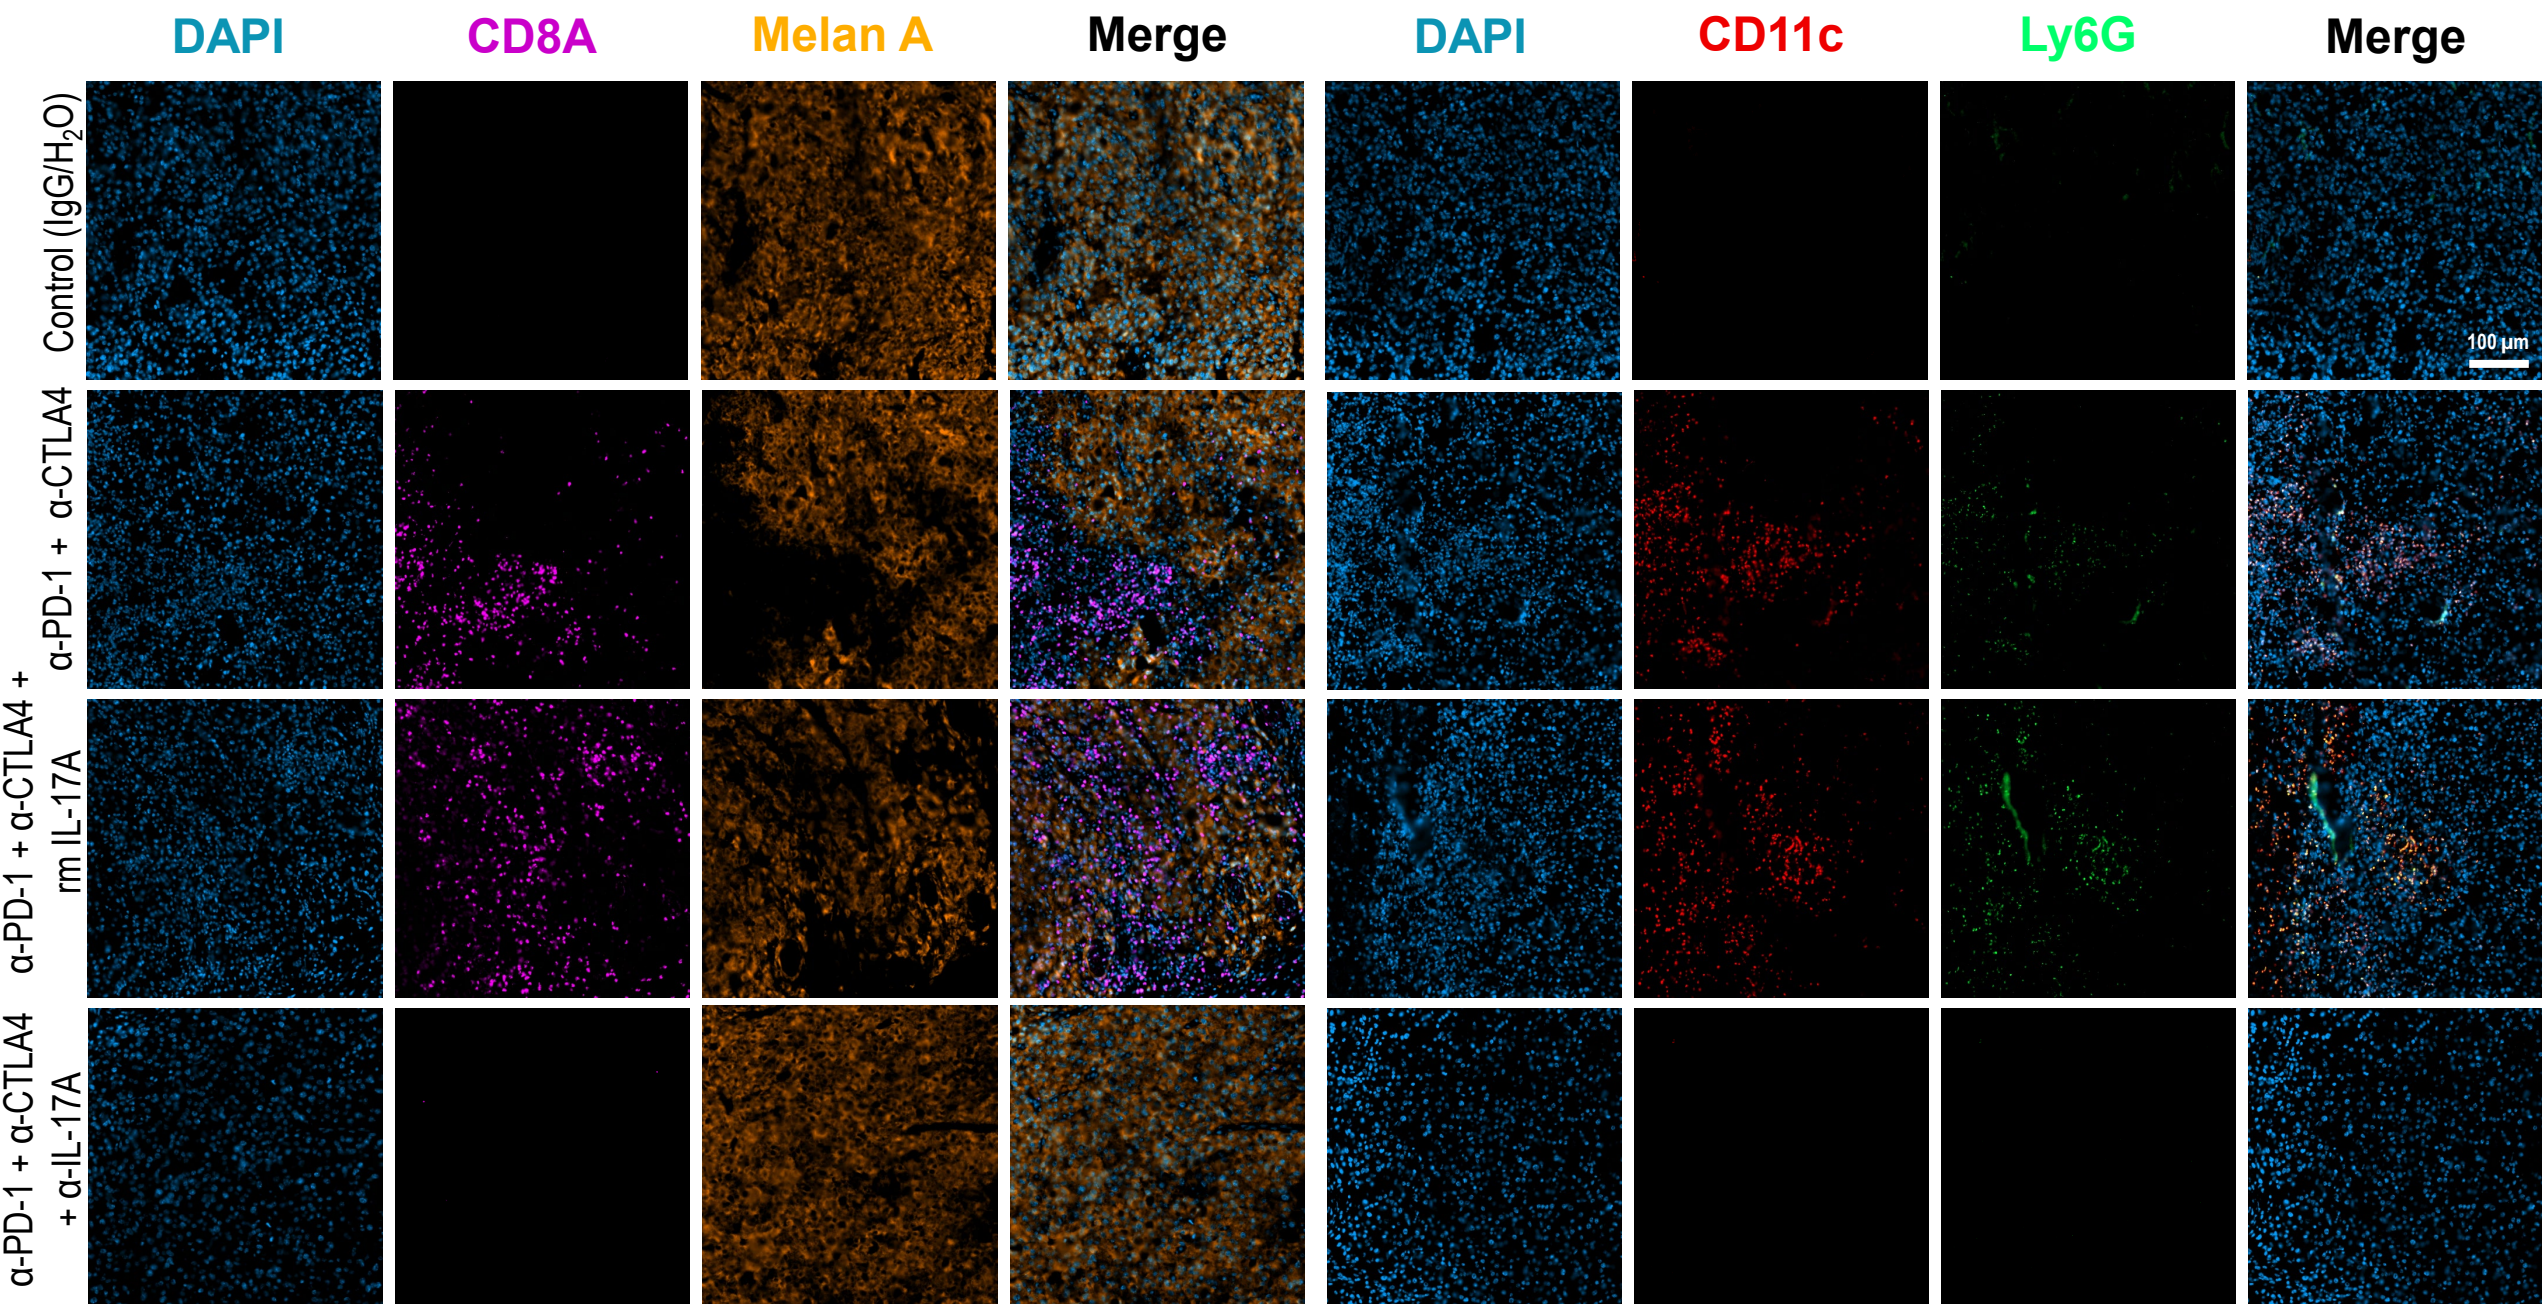

Figure S2b

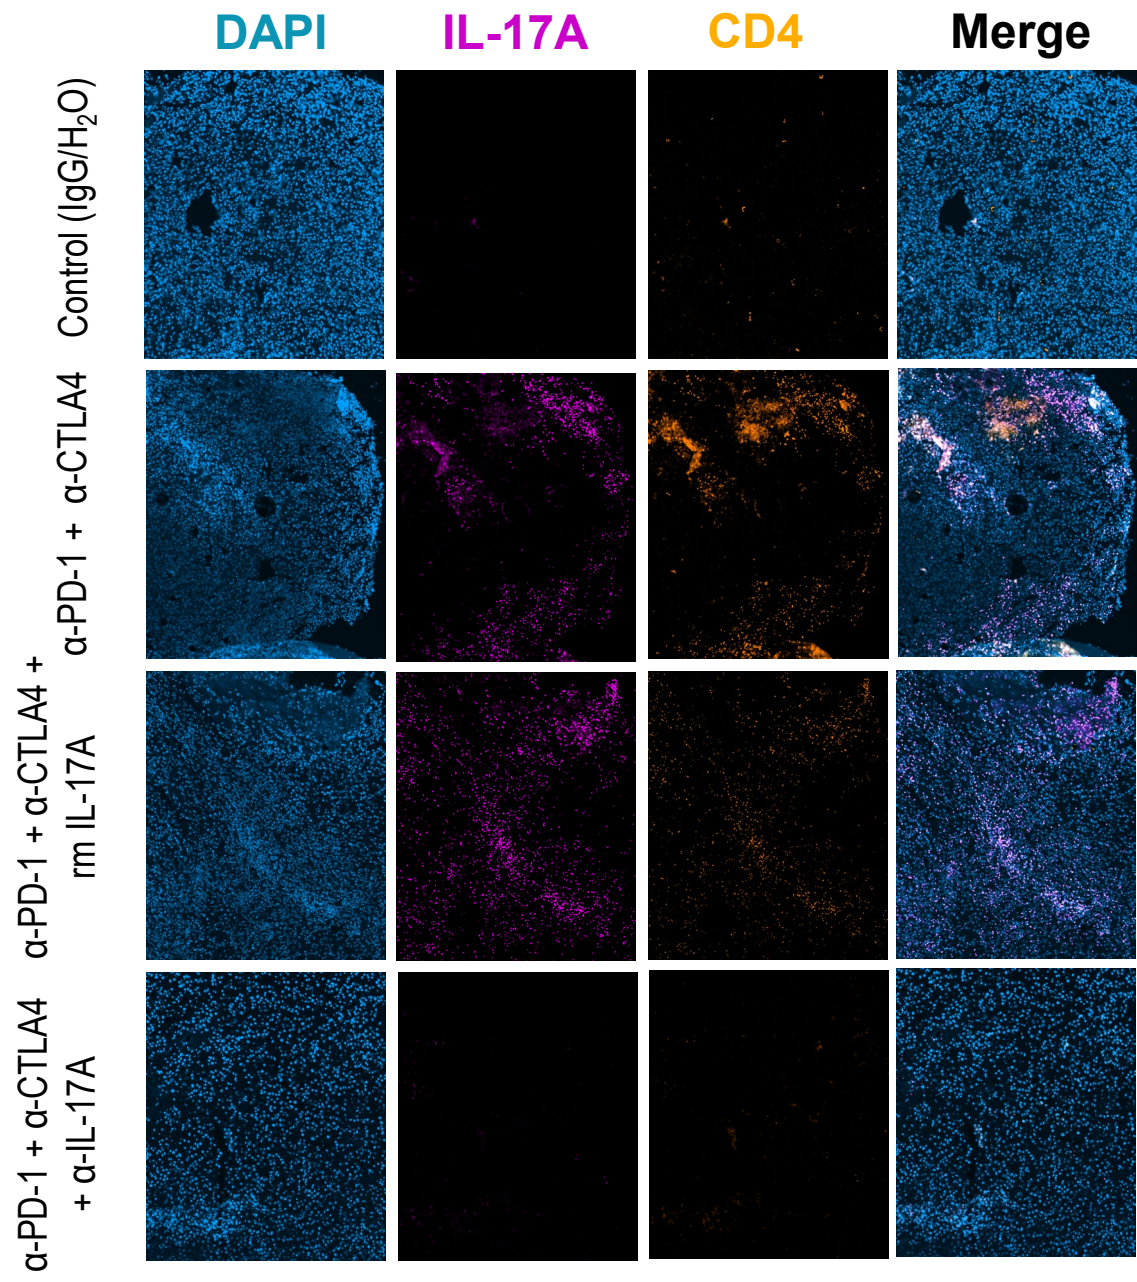

Supplement: 43018_2023_610_MOESM5_ESM.pdf [file 43018_2023_610_MOESM5_ESM.pdf]
